# Supplementary material for: Synthesis of Blue‐Green Phosphors Sr4Si3O8Cl4:Eu2+ by Gel‐Combustion Method and Their Luminescent Properties
Source: Hindawi journal article supplement (doi:10.1155/2013/683404), 2012-11-04
Supplement: f1 [file 683404.f1.xls]

## Sheet: Sheet1
2θ	I(700℃)	I(800℃)	I(900℃)	I(950℃)	I(1000℃)
10	0	0	0	0	0
10.06	77	93	53	65	80
10.12	68	75	39	72	60
10.18	80	71	49	66	61
10.24	65	76	40	67	65
10.3	73	74	54	85	67
10.36	70	81	38	80	58
10.42	76	77	43	68	64
10.48	77	82	41	49	57
10.54	64	70	43	59	49
10.6	84	77	54	79	64
10.66	77	85	37	62	52
10.72	61	83	42	75	56
10.78	75	69	37	65	62
10.84	69	77	46	65	54
10.9	84	61	40	70	61
10.96	62	73	33	78	41
11.02	79	77	34	49	50
11.08	58	73	35	56	58
11.14	69	61	42	61	65
11.2	61	99	33	54	43
11.26	51	75	34	54	33
11.32	61	121	56	61	57
11.38	61	108	61	53	37
11.44	82	67	86	63	50
11.5	70	74	85	53	51
11.56	79	62	32	56	57
11.62	59	64	20	52	44
11.68	60	62	29	43	39
11.74	68	53	34	61	46
11.8	56	49	34	51	38
11.86	59	49	38	50	39
11.92	57	52	33	50	42
11.98	64	52	19	40	36
12.04	61	52	18	44	48
12.1	57	51	22	39	37
12.16	54	46	21	32	43
12.22	67	46	27	36	38
12.28	57	62	24	44	39
12.34	53	72	24	42	41
12.4	62	68	36	29	42
12.46	50	58	39	32	35
12.52	54	58	39	47	43
12.58	63	62	25	35	43
12.64	58	57	22	43	38
12.7	93	54	20	30	48
12.76	86	49	14	27	51
12.82	55	61	19	28	73
12.88	55	65	15	40	107
12.94	73	97	22	37	182
13	72	118	19	33	212
13.06	59	97	15	28	105
13.12	56	47	25	36	48
13.18	50	52	24	24	42
13.24	55	41	14	29	37
13.3	57	42	17	32	33
13.36	48	62	18	40	35
13.42	49	47	10	28	31
13.48	45	47	23	32	34
13.54	50	37	20	25	44
13.6	55	40	11	17	30
13.66	53	50	16	24	33
13.72	53	38	12	24	33
13.78	51	28	23	19	31
13.84	43	49	12	19	33
13.9	58	45	16	27	22
13.96	37	43	20	26	29
14.02	36	45	13	22	27
14.08	52	23	14	24	30
14.14	56	39	11	21	35
14.2	51	34	18	19	20
14.26	32	38	20	18	21
14.32	40	23	14	22	30
14.38	34	32	17	21	31
14.44	36	44	25	15	27
14.5	35	39	15	22	29
14.56	33	33	21	27	26
14.62	32	37	20	23	28
14.68	43	48	20	26	41
14.74	37	37	16	40	47
14.8	39	39	8	34	46
14.86	28	35	18	27	37
14.92	39	33	26	29	24
14.98	41	38	19	17	25
15.04	31	27	13	30	28
15.1	26	32	10	25	30
15.16	30	28	26	26	29
15.22	33	29	19	36	21
15.28	25	23	20	27	28
15.34	34	26	18	32	26
15.4	24	39	22	29	32
15.46	25	25	16	29	33
15.52	28	22	16	44	31
15.58	28	23	22	57	45
15.64	21	26	16	55	48
15.7	25	28	18	41	34
15.76	37	17	14	68	36
15.82	54	26	25	138	83
15.88	54	45	16	193	142
15.94	47	77	25	150	71
16	44	127	62	46	32
16.06	32	103	107	28	29
16.12	31	31	213	15	29
16.18	38	23	99	27	19
16.24	33	31	45	23	33
16.3	26	28	21	18	29
16.36	20	23	19	26	22
16.42	22	23	26	18	31
16.48	25	29	13	32	21
16.54	22	26	7	18	20
16.6	24	19	19	20	13
16.66	19	24	10	22	14
16.72	17	24	18	13	20
16.78	24	23	16	15	21
16.84	24	24	17	25	19
16.9	24	23	18	19	11
16.96	34	27	15	23	23
17.02	23	25	13	31	20
17.08	17	28	21	19	22
17.14	21	22	14	23	19
17.2	16	28	22	24	20
17.26	25	21	20	18	21
17.32	24	15	19	25	24
17.38	22	17	10	19	15
17.44	16	28	14	27	16
17.5	21	38	14	36	29
17.56	24	46	21	75	63
17.62	23	122	21	235	174
17.68	32	247	23	316	251
17.74	24	158	60	112	124
17.8	28	47	44	33	35
17.86	22	34	27	44	26
17.92	27	26	23	11	26
17.98	27	24	15	20	23
18.04	28	29	13	18	30
18.1	24	27	12	25	23
18.16	21	25	21	27	23
18.22	23	23	21	19	22
18.28	23	28	17	16	24
18.34	23	22	19	16	26
18.4	18	27	18	21	21
18.46	36	23	22	39	20
18.52	24	34	26	20	35
18.58	25	26	20	39	34
18.64	26	39	28	33	21
18.7	31	92	28	46	33
18.76	24	176	66	55	36
18.82	34	181	142	49	41
18.88	29	83	337	26	30
18.94	34	47	274	16	13
19	26	31	87	27	19
19.06	18	30	54	33	25
19.12	23	28	31	18	14
19.18	29	22	29	27	25
19.24	24	31	14	32	19
19.3	35	28	23	28	24
19.36	30	27	20	28	25
19.42	34	40	20	17	22
19.48	25	22	20	32	32
19.54	28	22	18	39	21
19.6	34	27	16	37	34
19.66	42	27	19	46	46
19.72	53	18	20	148	75
19.78	71	30	16	188	127
19.84	73	24	25	130	94
19.9	43	20	18	44	46
19.96	46	21	22	32	26
20.02	48	24	12	28	25
20.08	69	25	16	24	18
20.14	46	30	23	34	27
20.2	44	35	16	12	17
20.26	48	38	24	23	27
20.32	37	37	25	25	13
20.38	48	26	22	22	25
20.44	43	26	19	22	26
20.5	46	24	13	22	21
20.56	41	24	18	30	27
20.62	49	18	12	15	31
20.68	39	28	24	24	65
20.74	31	26	27	32	59
20.8	38	24	23	35	39
20.86	29	22	19	32	30
20.92	30	28	23	30	29
20.98	33	32	23	25	25
21.04	35	19	14	25	16
21.1	30	21	14	23	24
21.16	43	22	21	17	23
21.22	25	25	16	25	23
21.28	37	25	17	27	20
21.34	35	19	19	24	14
21.4	34	26	24	22	16
21.46	35	27	18	33	21
21.52	35	24	23	33	30
21.58	26	20	23	20	34
21.64	31	33	20	15	23
21.7	36	22	16	29	23
21.76	38	26	13	28	25
21.82	33	47	21	34	34
21.88	39	56	26	38	43
21.94	38	55	24	27	44
22	31	67	49	51	47
22.06	35	66	55	71	53
22.12	35	163	49	160	97
22.18	40	69	48	178	154
22.24	35	57	43	195	174
22.3	30	42	51	95	79
22.36	34	51	49	40	53
22.42	43	79	23	31	101
22.48	56	106	27	58	186
22.54	72	111	21	80	189
22.6	89	155	37	125	95
22.66	74	262	78	69	65
22.72	56	150	226	43	25
22.78	28	62	290	29	22
22.84	24	23	131	22	21
22.9	33	33	44	27	25
22.96	39	22	23	19	18
23.02	34	33	25	11	19
23.08	37	33	18	25	16
23.14	32	34	22	18	31
23.2	42	39	22	26	24
23.26	30	25	18	19	18
23.32	31	30	21	19	25
23.38	38	32	22	22	17
23.44	42	25	22	17	24
23.5	42	36	14	8	22
23.56	60	29	14	25	30
23.62	43	32	19	23	25
23.68	55	35	15	28	22
23.74	33	26	28	26	24
23.8	32	20	26	19	15
23.86	26	26	18	22	13
23.92	37	29	23	26	16
23.98	34	29	18	18	23
24.04	37	34	13	19	16
24.1	46	18	17	18	19
24.16	30	21	22	23	17
24.22	39	31	18	30	32
24.28	34	28	13	31	29
24.34	37	28	17	25	27
24.4	41	22	21	22	27
24.46	36	32	15	19	23
24.52	37	41	28	27	26
24.58	37	29	14	19	23
24.64	27	34	20	21	23
24.7	43	28	21	42	30
24.76	34	34	21	37	22
24.82	40	31	23	29	34
24.88	55	27	16	44	34
24.94	40	36	28	75	32
25	55	59	21	153	114
25.06	53	127	23	438	350
25.12	54	293	47	580	588
25.18	41	205	78	350	372
25.24	55	141	158	102	160
25.3	74	227	106	75	196
25.36	73	370	89	59	147
25.42	75	201	269	32	70
25.48	101	78	340	39	45
25.54	101	50	151	32	30
25.6	91	37	50	29	33
25.66	71	32	30	33	31
25.72	43	36	43	34	26
25.78	48	67	16	37	28
25.84	59	68	33	26	20
25.9	57	67	74	35	19
25.96	47	33	75	26	30
26.02	69	36	62	31	27
26.08	60	36	29	26	26
26.14	81	27	21	25	30
26.2	90	34	15	17	26
26.26	101	40	30	25	28
26.32	109	36	26	21	35
26.38	107	36	20	35	20
26.44	82	38	22	34	31
26.5	58	41	19	50	58
26.56	54	51	15	164	143
26.62	63	113	27	248	214
26.68	41	159	42	235	202
26.74	53	88	58	144	133
26.8	35	49	67	67	91
26.86	36	28	43	44	41
26.92	34	34	25	31	17
26.98	47	32	25	27	28
27.04	50	24	15	24	30
27.1	34	25	19	39	25
27.16	54	25	21	25	27
27.22	51	32	14	39	23
27.28	43	36	25	19	21
27.34	40	32	24	30	20
27.4	46	29	13	33	27
27.46	60	24	23	21	25
27.52	40	32	20	26	29
27.58	47	22	23	44	39
27.64	52	30	22	47	53
27.7	56	31	20	81	57
27.76	50	41	20	79	66
27.82	52	33	19	87	63
27.88	73	36	15	111	80
27.94	87	35	18	204	101
28	99	43	19	199	119
28.06	121	27	14	102	81
28.12	89	25	15	53	53
28.18	85	22	22	33	29
28.24	72	28	17	29	23
28.3	91	36	19	19	28
28.36	127	24	16	25	26
28.42	233	28	16	23	32
28.48	223	37	15	22	28
28.54	175	35	17	28	23
28.6	127	32	26	38	17
28.66	94	28	43	36	28
28.72	72	32	25	15	26
28.78	62	30	15	20	19
28.84	53	24	14	23	19
28.9	55	24	20	22	26
28.96	53	24	18	19	22
29.02	50	25	19	28	15
29.08	49	22	28	17	23
29.14	55	24	25	25	12
29.2	66	30	20	13	17
29.26	63	25	20	22	23
29.32	89	32	19	18	25
29.38	96	47	25	28	18
29.44	102	58	38	18	15
29.5	167	58	62	27	20
29.56	223	39	86	19	20
29.62	220	36	59	23	19
29.68	157	29	42	25	28
29.74	97	24	33	20	26
29.8	77	38	15	20	32
29.86	57	25	25	34	24
29.92	59	29	28	24	30
29.98	45	25	19	33	34
30.04	43	21	20	29	29
30.1	43	30	13	15	30
30.16	46	20	18	27	35
30.22	37	26	26	21	35
30.28	50	33	33	31	26
30.34	50	25	40	32	35
30.4	40	45	19	44	36
30.46	41	68	26	52	38
30.52	33	56	40	67	32
30.58	37	54	41	70	52
30.64	50	56	51	205	178
30.7	40	105	40	407	393
30.76	46	256	41	688	573
30.82	50	409	67	631	492
30.88	70	347	170	404	363
30.94	64	195	196	306	337
31	63	99	152	196	296
31.06	55	57	68	118	160
31.12	69	41	43	44	62
31.18	49	32	34	46	31
31.24	62	35	40	55	38
31.3	58	39	27	67	60
31.36	61	73	37	65	85
31.42	55	68	40	51	83
31.48	50	71	37	46	50
31.54	64	119	50	37	37
31.6	60	261	72	98	30
31.66	85	652	168	135	48
31.72	91	684	545	111	45
31.78	90	433	1130	61	30
31.84	88	171	878	36	34
31.9	77	82	433	35	31
31.96	63	59	130	38	41
32.02	58	58	65	46	24
32.08	67	55	56	36	24
32.14	70	76	43	51	37
32.2	76	105	32	60	33
32.26	66	84	64	94	63
32.32	73	50	96	76	67
32.38	73	41	63	69	42
32.44	64	38	30	43	37
32.5	56	38	26	22	23
32.56	65	30	27	37	23
32.62	47	32	31	32	34
32.68	56	29	29	27	31
32.74	52	37	26	25	27
32.8	60	29	20	27	16
32.86	49	27	29	30	34
32.92	61	47	18	18	19
32.98	45	33	21	39	22
33.04	37	28	23	26	32
33.1	49	43	20	29	26
33.16	50	35	16	26	32
33.22	59	33	16	32	33
33.28	60	26	25	26	24
33.34	56	44	23	36	26
33.4	59	46	21	41	32
33.46	79	41	22	53	51
33.52	83	67	39	88	57
33.58	88	95	24	65	43
33.64	84	102	79	60	34
33.7	73	67	139	55	24
33.76	70	41	106	75	54
33.82	81	55	61	137	68
33.88	86	48	36	121	112
33.94	88	42	23	110	81
34	93	83	18	80	154
34.06	82	85	11	96	172
34.12	81	75	24	62	114
34.18	75	40	23	48	64
34.24	73	32	22	30	38
34.3	63	35	23	28	32
34.36	55	32	17	31	26
34.42	70	45	20	31	24
34.48	62	52	33	46	27
34.54	75	56	29	42	49
34.6	65	60	54	49	43
34.66	84	59	70	43	48
34.72	85	33	44	40	24
34.78	76	37	32	22	29
34.84	76	41	13	25	31
34.9	70	43	24	28	20
34.96	73	42	23	19	22
35.02	56	27	31	29	26
35.08	66	42	26	32	23
35.14	59	32	22	30	29
35.2	61	35	31	37	30
35.26	42	28	28	33	36
35.32	69	20	29	38	38
35.38	97	35	22	39	32
35.44	76	46	28	35	43
35.5	93	35	26	55	41
35.56	105	86	23	153	94
35.62	76	164	34	230	159
35.68	72	129	33	177	138
35.74	93	120	60	140	111
35.8	107	60	59	85	62
35.86	90	36	37	50	51
35.92	98	50	36	35	37
35.98	75	95	36	56	32
36.04	82	329	59	82	26
36.1	68	424	166	74	30
36.16	74	319	556	56	36
36.22	54	175	453	42	26
36.28	43	67	283	43	23
36.34	62	50	121	64	44
36.4	56	36	54	101	89
36.46	63	48	47	153	125
36.52	50	48	36	183	185
36.58	56	35	33	168	193
36.64	60	25	43	125	152
36.7	45	43	30	83	82
36.76	45	31	34	43	52
36.82	44	33	23	43	29
36.88	49	25	32	52	30
36.94	59	29	28	52	48
37	45	30	31	42	39
37.06	59	41	27	31	29
37.12	53	23	23	29	24
37.18	44	33	26	16	26
37.24	38	24	28	32	19
37.3	52	31	20	21	21
37.36	34	38	27	20	16
37.42	34	86	37	24	13
37.48	50	107	67	40	24
37.54	40	75	86	34	18
37.6	52	44	104	25	26
37.66	38	36	75	20	25
37.72	40	37	37	23	22
37.78	31	35	29	28	18
37.84	41	36	39	25	21
37.9	42	78	37	23	25
37.96	41	98	52	36	28
38.02	50	83	95	33	24
38.08	37	63	146	35	16
38.14	35	43	91	21	27
38.2	50	32	57	20	18
38.26	43	28	36	16	27
38.32	49	26	23	26	14
38.38	53	30	21	25	16
38.44	37	38	18	32	22
38.5	43	35	16	29	15
38.56	55	25	24	23	20
38.62	25	14	20	28	21
38.68	30	28	23	35	18
38.74	36	32	16	42	32
38.8	34	25	13	45	47
38.86	46	37	20	37	25
38.92	28	34	17	67	39
38.98	47	48	19	48	23
39.04	44	40	28	49	36
39.1	42	35	29	33	33
39.16	30	22	26	27	31
39.22	32	35	27	27	38
39.28	37	36	23	30	56
39.34	42	42	20	31	68
39.4	41	49	14	22	81
39.46	38	52	30	23	65
39.52	32	30	22	24	41
39.58	33	29	14	33	23
39.64	29	23	24	37	21
39.7	42	23	12	40	25
39.76	39	29	8	65	53
39.82	51	28	18	51	48
39.88	55	25	19	73	46
39.94	57	31	25	57	51
40	68	42	25	69	65
40.06	79	52	20	62	48
40.12	88	53	47	53	28
40.18	82	39	58	34	33
40.24	75	25	48	26	21
40.3	64	23	38	29	17
40.36	54	28	19	29	23
40.42	40	21	21	30	23
40.48	41	22	19	17	17
40.54	39	30	26	21	20
40.6	56	32	20	15	27
40.66	51	32	28	18	19
40.72	58	31	27	31	24
40.78	58	70	38	31	29
40.84	64	103	43	34	20
40.9	66	175	88	43	24
40.96	50	192	193	49	28
41.02	48	125	251	26	41
41.08	50	122	160	22	112
41.14	53	91	137	31	122
41.2	45	64	51	28	92
41.26	47	75	31	32	62
41.32	43	73	38	27	38
41.38	47	51	45	35	31
41.44	74	36	52	53	31
41.5	58	24	46	32	28
41.56	56	40	50	34	24
41.62	59	32	21	24	26
41.68	47	31	18	24	25
41.74	63	24	21	12	19
41.8	62	28	27	25	21
41.86	56	26	18	20	22
41.92	40	20	18	26	18
41.98	57	17	10	27	17
42.04	48	22	11	21	15
42.1	30	30	16	32	19
42.16	42	21	14	21	18
42.22	44	17	9	21	26
42.28	46	22	11	20	19
42.34	43	22	20	19	27
42.4	53	18	17	28	21
42.46	49	20	15	27	17
42.52	44	23	22	29	23
42.58	43	24	26	25	27
42.64	52	18	23	33	25
42.7	42	19	21	24	24
42.76	50	24	20	22	30
42.82	59	34	16	50	41
42.88	71	29	13	77	50
42.94	97	22	23	85	59
43	101	28	15	90	64
43.06	97	30	21	90	69
43.12	61	27	19	117	101
43.18	65	28	12	139	102
43.24	53	27	18	108	72
43.3	72	35	10	77	57
43.36	49	27	25	46	39
43.42	41	20	15	35	34
43.48	47	18	17	32	19
43.54	42	33	16	27	30
43.6	39	25	16	42	24
43.66	47	34	14	33	36
43.72	40	31	19	70	45
43.78	43	44	16	99	117
43.84	39	51	20	114	138
43.9	35	80	28	154	174
43.96	35	129	36	326	281
44.02	40	197	37	381	329
44.08	59	251	91	502	416
44.14	37	235	113	405	393
44.2	41	160	153	306	357
44.26	52	128	114	185	235
44.32	30	56	73	109	127
44.38	36	38	43	64	79
44.44	30	38	35	36	45
44.5	35	41	21	34	31
44.56	36	41	29	38	28
44.62	36	50	38	31	26
44.68	26	41	59	30	28
44.74	22	50	56	27	21
44.8	36	38	48	44	27
44.86	42	29	43	63	40
44.92	52	40	32	59	46
44.98	55	32	17	65	45
45.04	52	35	20	66	45
45.1	39	34	23	42	40
45.16	52	32	19	49	29
45.22	48	20	23	37	36
45.28	39	30	19	23	35
45.34	49	35	18	29	39
45.4	33	31	18	26	33
45.46	46	39	23	20	23
45.52	44	28	12	20	23
45.58	32	21	16	30	30
45.64	35	30	12	32	23
45.7	38	32	16	20	32
45.76	40	45	14	21	27
45.82	53	43	33	27	33
45.88	67	38	35	27	32
45.94	54	37	24	35	38
46	53	54	42	25	39
46.06	66	96	35	41	53
46.12	45	131	80	53	36
46.18	36	110	156	55	34
46.24	37	95	129	45	50
46.3	41	50	113	58	58
46.36	53	36	68	72	49
46.42	57	35	40	44	43
46.48	41	23	20	46	33
46.54	36	21	28	35	23
46.6	50	21	20	37	31
46.66	57	17	12	24	19
46.72	61	19	18	29	25
46.78	67	24	12	21	21
46.84	62	24	16	24	19
46.9	54	28	18	17	24
46.96	31	22	24	24	20
47.02	41	23	16	26	13
47.08	43	20	31	24	26
47.14	36	15	20	13	15
47.2	41	26	19	26	25
47.26	35	32	23	27	30
47.32	37	35	14	23	27
47.38	37	38	25	22	28
47.44	42	33	29	29	30
47.5	47	69	29	38	39
47.56	52	124	41	41	35
47.62	48	91	100	94	70
47.68	42	93	129	113	103
47.74	52	87	70	126	107
47.8	43	90	69	134	134
47.86	54	93	60	118	125
47.92	59	71	35	75	92
47.98	61	59	34	86	74
48.04	57	43	50	61	68
48.1	67	34	32	49	50
48.16	46	36	22	33	24
48.22	50	35	22	31	54
48.28	45	28	20	32	28
48.34	52	34	17	29	14
48.4	52	29	18	27	21
48.46	48	23	21	41	26
48.52	60	29	16	39	25
48.58	54	28	15	46	27
48.64	61	38	18	46	37
48.7	69	38	31	33	32
48.76	48	27	31	39	16
48.82	43	43	21	27	20
48.88	57	26	28	27	23
48.94	42	48	31	26	23
49	36	119	25	23	24
49.06	38	104	81	29	19
49.12	32	71	157	29	25
49.18	35	50	75	30	26
49.24	38	35	80	34	25
49.3	28	31	53	37	19
49.36	35	20	19	40	32
49.42	34	21	25	36	28
49.48	33	21	21	28	23
49.54	44	31	13	22	36
49.6	37	17	18	25	22
49.66	31	22	19	28	21
49.72	37	20	13	29	25
49.78	40	18	17	18	28
49.84	35	20	18	17	21
49.9	29	27	23	18	29
49.96	34	38	27	25	34
